# Supplementary material for: Classification and Quantification of Physical Therapy Interventions across Multiple Neurological Disorders: An Italian Multicenter Network
Source: MDPI journal article supplement (doi:10.3390/jcm12206483), 2023-10-12
Supplement: s1 [file s1]

**Table S2.** PT intervention effectiveness in subgroups.

| Pathology | Outcome | T0<br>Mean (SD) | T1<br>Mean (SD) | Improvement<br>Mean (SD) | MCID              |
|-----------|---------|-----------------|-----------------|--------------------------|-------------------|
| PwST      | 2MWT    | N= 105          | N= 103          | N= 99                    | Improved = 68     |
|           |         | 41.5 (43.7)     | 73.4 (46.4)     | 33.6 (34.9)              | Not improved = 31 |
|           | MDGI    | N= 107          | N= 101          | N= 98                    | Improved = 70     |
|           |         | 16.8 (16.9)     | 32 (19.9)       | 16.1 (14.2)              | Not improved = 28 |
|           | BBT     | N= 94           | N= 89           | N= 88                    | Improved = 37     |
|           |         | 20.2 (16.7)     | 26.7 (18.1)     | 6.3 (9.4)                | Not improved = 51 |
|           | MBI     | N= 118          | N= 109          | N= 109                   | Improved = 72     |
|           |         | 57.4 (23.9)     | 80.6 (19.1)     | 24 (22.5)                | Not improved = 37 |
| PwMS      | 2MWT    | N= 44           | N= 40           | N= 39                    | Improved = 10     |
|           |         | 59.4 (55.7)     | 65.5 (50.7)     | 2.4 (29.1)               | Not improved = 29 |
|           | MDGI    | N= 39           | N= 35           | N= 34                    | Improved = 7      |
|           |         | 22.9 (19)       | 25.6 (21.5)     | 2.7 (6.1)                | Not improved = 27 |
|           | BBT     | N= 47           | N= 40           | N= 40                    | Improved = 13     |
|           |         | 29.3 (12.7)     | 33.5 (13.1)     | 2.9 (6.3)                | Not improved = 27 |
|           | MBI     | N= 48           | N= 43           | N= 43                    | Improved = 4      |
|           |         | 73.8 (23.8)     | 78.5 (22.6)     | 4.1 (7.5)                | Not improved = 39 |
| PwPD      | 2MWT    | N= 27           | N= 23           | N= 22                    | Improved = 5      |
|           |         | 92.2 (54.8)     | 98.7 (55.3)     | 5 (19.2)                 | Not improved = 17 |
|           | MDGI    | N= 32           | N= 28           | N= 28                    | Improved = 6      |
|           |         | 36.6 (18.1)     | 39.6 (18)       | 2.2 (5.31)               | Not improved = 22 |
|           | BBT     | N= 35           | N= 30           | N= 30                    | Improved = 6      |
|           |         | 37.4 (11.4)     | 40.93 (10.7)    | 2.5 (7.6)                | Not improved = 24 |
|           | MBI     | N= 35           | N= 30           | N= 30                    | Improved = 3      |
|           |         | 80.5 (28.2)     | 84.00 (21.6)    | 2.6 (14.2)               | Not improved = 27 |

Abbreviations: PwST, People with Stroke; PwMS, People with Multiple Sclerosis; PwPD, People with Parkinson's Disease; N, Number of subjects; SD, Standard deviation; MCID, Minimally clinically important difference; 2MWT, 2 Minute Walking Test; MDGI, Modified Dynamic Gait Index; BBT, Box and Block Test (most affected side); MBI, Modified Barthel Index.
