# Supplementary material for: Classification and Quantification of Physical Therapy Interventions across Multiple Neurological Disorders: An Italian Multicenter Network
Source: MDPI journal article supplement (doi:10.3390/jcm12206483), 2023-10-12
Supplement: s1 [file s1]

| Therapeutic goals         | Priority | Time                                    |
|---------------------------|----------|-----------------------------------------|
|                           | (1,2,3)  | %                                       |
| Functional - Activities   |          | sum of the 3 percentages MUST BE = 100% |
| Manipulation              |          |                                         |
| Walking                   |          |                                         |
| Postural transitions      |          |                                         |
| Stair climbing            |          |                                         |
| ADL                       |          |                                         |
| Impairment                |          |                                         |
| Pain                      |          |                                         |
| Joint mobility            |          |                                         |
| Muscle strength           |          |                                         |
| Sensory functions         |          |                                         |
| Balance                   |          |                                         |
| Trunk control             |          |                                         |
| Standing position         |          |                                         |
| Tertiary prevention       |          |                                         |
| Cardiorespiratory fitness |          |                                         |
| Cognitive function        |          |                                         |
| Genitourinary functions   |          |                                         |
| Participation             |          |                                         |
| Outdoor mobility          |          |                                         |
| Quality of life           |          |                                         |
| Other                     |          |                                         |
|                           |          |                                         |

LEGEND

**Preliminary remark:** Not all the possible therapeutic goals or treatments are already indicated in this form, please use the proper empty spaces to indicate what is not already included.

**Priority:** please indicate 3 main rehabilitative aims and give them a level of priority: **1(high), 2(medium), 3 (low).**

**Time %:** indicate the percentage of **time dedicated** to each selected goal, compared to total time of treatment.

**IN/OUT PATIENT:** indicate whether the setting of rehabilitative intervention is hospital-based **(IN)** or not **(OUT)**.

SUBJECT DATA

Name \_\_\_\_\_

Sessions frequency: n° \_\_\_\_\_ times/week

Session lasting: \_\_ min

IN/OUT PATIENT: ☐ IN ☐ OUT

Other Therapies:

☐Speech/swallow rehabilitation ☐Occupational Therapy

☐Neuropsychologist ☐Massage Therapy

☐\_\_\_\_\_ (Other)

| Interventions                                     | Goal 1 | Goal 2 | Goal 3 |
|---------------------------------------------------|--------|--------|--------|
|                                                   | % time | % time | % time |
| Aid training                                      |        |        |        |
| Aerobic training                                  |        |        |        |
| Postural alignment exercises                      |        |        |        |
| Constraint induced movement therapy               |        |        |        |
| Counselling                                       |        |        |        |
| Tactile sensitivity exercises                     |        |        |        |
| Dual-task exercises                               |        |        |        |
| Manipulation-grasping exercises                   |        |        |        |
| Proprioceptive exercises                          |        |        |        |
| Vestibular exercises                              |        |        |        |
| Motor imagery                                     |        |        |        |
| Lymphatic drainage                                |        |        |        |
| Passive mobilization                              |        |        |        |
| Muscle recruitment exercises                      |        |        |        |
| Resistance training                               |        |        |        |
| Stretching                                        |        |        |        |
| Manual therapy                                    |        |        |        |
| Instrumental physical therapies<br>(specify_____) |        |        |        |
| Walking training                                  |        |        |        |
| Balance training                                  |        |        |        |
| Sensory strategies training                       |        |        |        |
| Myofascial release                                |        |        |        |
|                                                   |        |        |        |
|                                                   |        |        |        |
|                                                   |        |        |        |
|                                                   |        |        |        |
|                                                   |        |        |        |

Note: Indicate up to 5 interventions type for each goal. Specify the percentage time dedicated to each intervention. The sum must be 100% for each goal.
