# Supplementary material for: Classification and Quantification of Physical Therapy Interventions across Multiple Neurological Disorders: An Italian Multicenter Network
Source: MDPI journal article supplement (doi:10.3390/jcm12206483), 2023-10-12
Supplement: s1 [file s1]

**Table S1.** List of Physical Therapy Goals matched with ICF categories from generic, rehabilitation, and neurological core set.

| THERAPEUTIC GOALS         | ICF CATEGORIES                                                                                                                                                                                                                                                                                                                                                                                               |
|---------------------------|--------------------------------------------------------------------------------------------------------------------------------------------------------------------------------------------------------------------------------------------------------------------------------------------------------------------------------------------------------------------------------------------------------------|
| <b>ACTIVITIES</b>         |                                                                                                                                                                                                                                                                                                                                                                                                              |
| Manipulation              | Fine hand use (d440); Hand and arm use (d445); Lifting and carrying objects (d430)                                                                                                                                                                                                                                                                                                                           |
| Walking                   | Walking (d450)                                                                                                                                                                                                                                                                                                                                                                                               |
| Postural transitions      | Changing basic body position (d410); Repositioning oneself (d420)                                                                                                                                                                                                                                                                                                                                            |
| Standing position         | Standing (d4104); Maintaining a standing position (d4154)                                                                                                                                                                                                                                                                                                                                                    |
| Stair climbing            | Moving around within the home (d4600); Moving around within buildings other than the home (d4601);                                                                                                                                                                                                                                                                                                           |
| ADL                       | Undertaking a single task (d210); Undertaking multiple tasks (d220); Carrying out daily routine (d230); Washing oneself (d510); Doing housework (d640); Caring body parts (d520); Toileting (d530); Dressing (d540); Eating d (d550); Drinking (d560); Preparing Meals (d630)                                                                                                                                |
| <b>PARTICIPATION</b>      |                                                                                                                                                                                                                                                                                                                                                                                                              |
| Outdoor mobility          | Moving around outside the home and other buildings (d4602); Using transportation (d470)                                                                                                                                                                                                                                                                                                                      |
| Quality of life           | Acquiring skills (d155); Solving problems (d175); Making decisions (d177); Handling stress and other psychological demands (d240); Basic interpersonal relationships (d710); Complex interpersonal interactions (b720); Informal social relationships (d750); Human Rights (d940); Remunerative employment (d850); Non-remunerative employment (d855); Community life (d910); Recreation and leisure (d920). |
| <b>IMPAIRMENT</b>         |                                                                                                                                                                                                                                                                                                                                                                                                              |
| Pain                      | Sensation of pain (b280)                                                                                                                                                                                                                                                                                                                                                                                     |
| Joint mobility            | Mobility of joint functions (b710); Stability of joint functions (b715); Mobility of bone functions (b720);                                                                                                                                                                                                                                                                                                  |
| Muscle strength           | Muscle power functions (b730); Muscle tone functions (b735); Muscle endurance functions (b740); Motor reflex function (b750); Control of voluntary movement functions (b760)                                                                                                                                                                                                                                 |
| Sensory functions         | Proprioceptive function (b260); Sensations related to muscles and movement functions (b780); Touch function (b265); Sensory functions related to temperature and other stimuli (b270); Sensations related to the skin (b840)                                                                                                                                                                                 |
| Balance                   | Vestibular function (b235); Proprioceptive function (b260); Seeing function (b210); Involuntary movement reaction functions (b755)                                                                                                                                                                                                                                                                           |
| Trunk Control             | Power of isolated muscle and muscle groups (b7300); Power of muscles of the trunk (b7305); Tone of muscles of trunk (b7355).                                                                                                                                                                                                                                                                                 |
| Tertiary prevention       | Mobility of joint functions (b710); Mobility of bone functions (b720); Muscle tone functions (b735); Protective function of the skin (b810); Repair function of the skin (b820).                                                                                                                                                                                                                             |
| Cardiorespiratory fitness | Heart functions (b410); Blood pressure functions (b420); Respiration functions (b440); Respiratory muscle functions (b445); Additional respiratory functions(b450); Exercise tolerance functions (b455).                                                                                                                                                                                                     |
| Cognitive function        | Orientation functions (b114); Attention functions (b140); Memory Functions (b144); Psychomotor functions (b147); Perceptual functions (b156); Thought functions (b160); Higher-level cognitive functions (b164); Mental function of sequencing complex movements (b176); Experience of self and time functions (b180).                                                                                       |
| Genitourinary functions   | Defecation functions (b525); Urination functions (b620); Sexual Functions (b640).                                                                                                                                                                                                                                                                                                                            |

Abbreviations: ICF, International Classification of Functioning , disability and health; ADL, Activities of daily living
