# Supplementary material for: Classification and Quantification of Physical Therapy Interventions across Multiple Neurological Disorders: An Italian Multicenter Network
Source: MDPI journal article supplement (doi:10.3390/jcm12206483), 2023-10-12
Supplement: s1 [file s1]

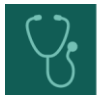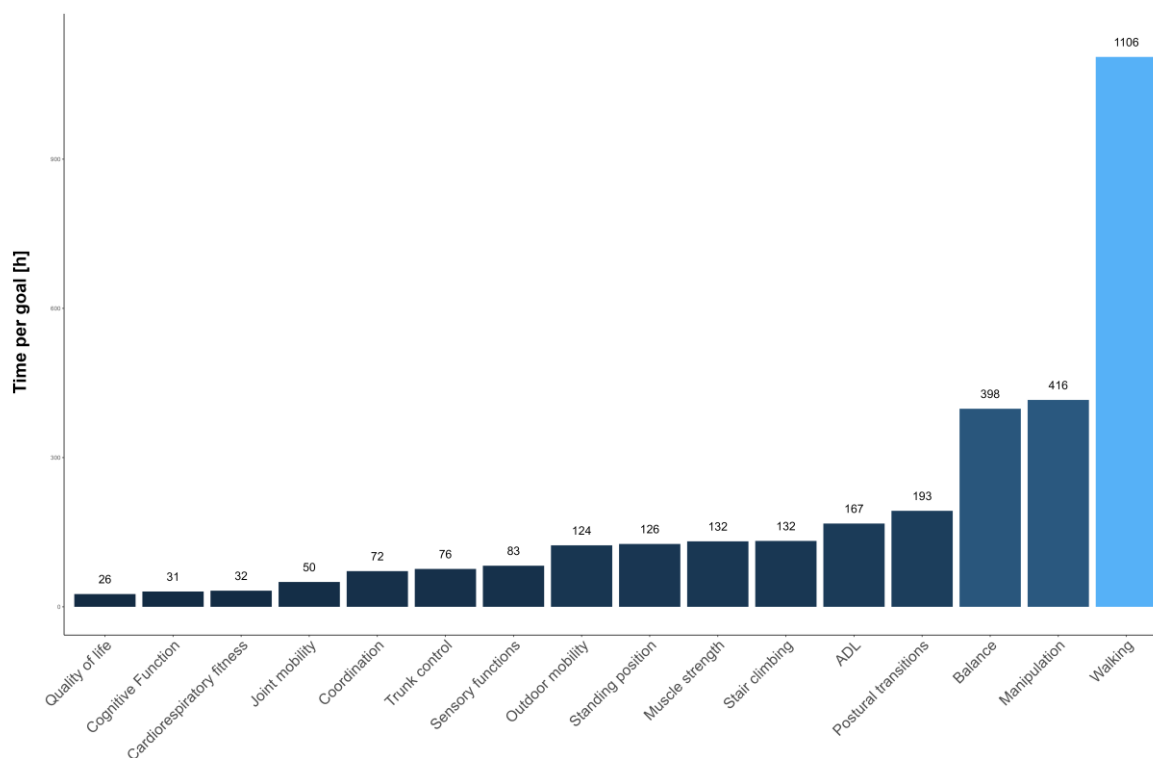

**Figure S2.** PT goals PwST.

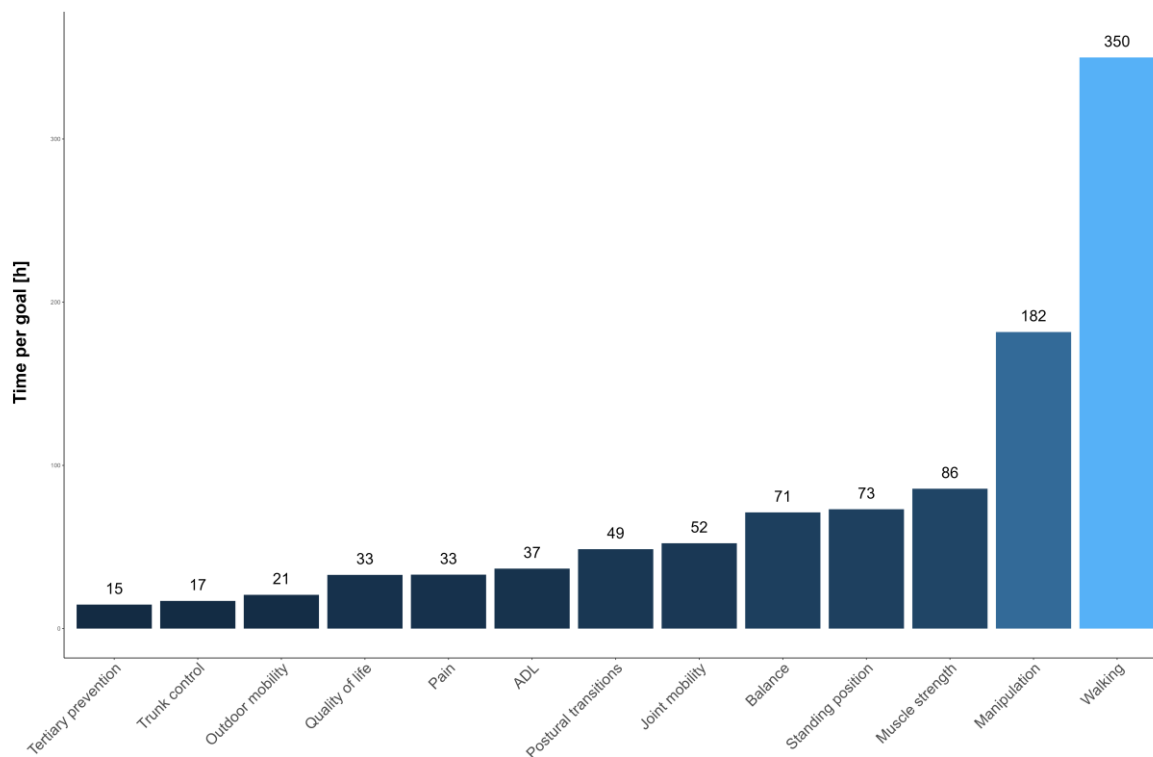

**Figure S3.** PT goals PwMS.

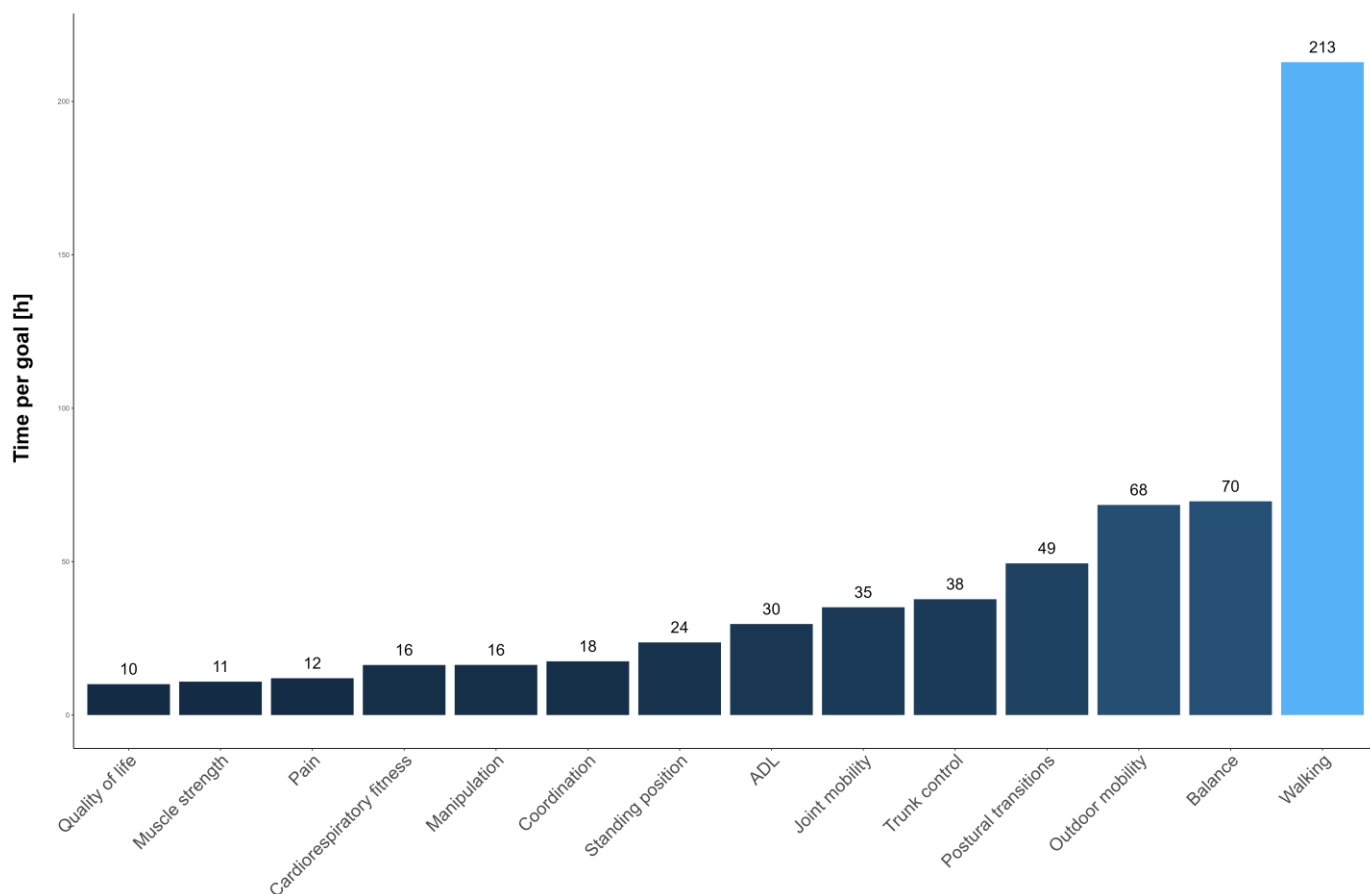

**Figure S4.** PT goals PwPD.

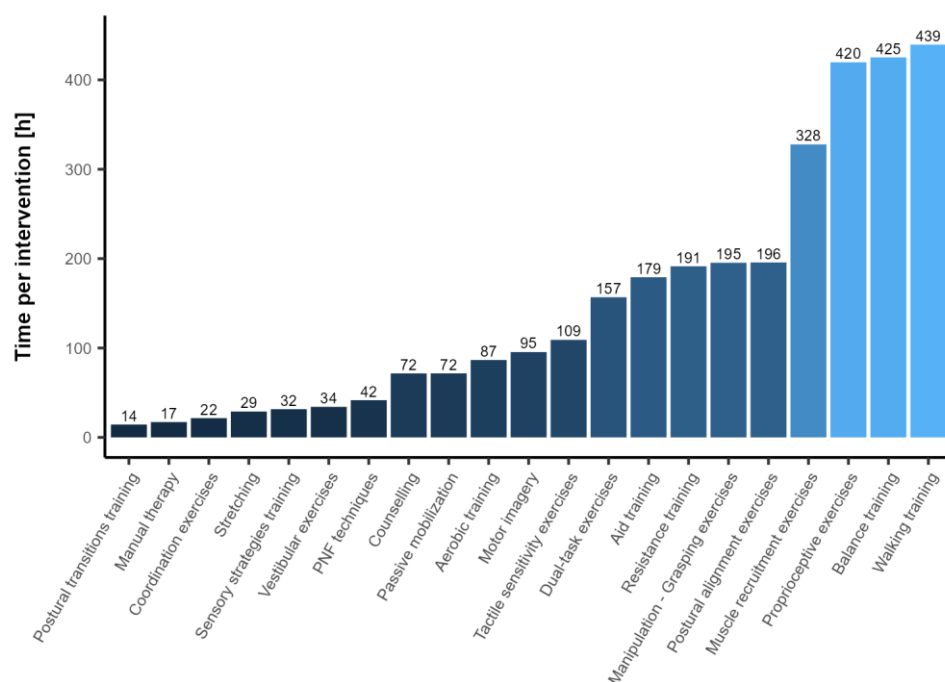

**Figure S5.** PT interventions PwST.

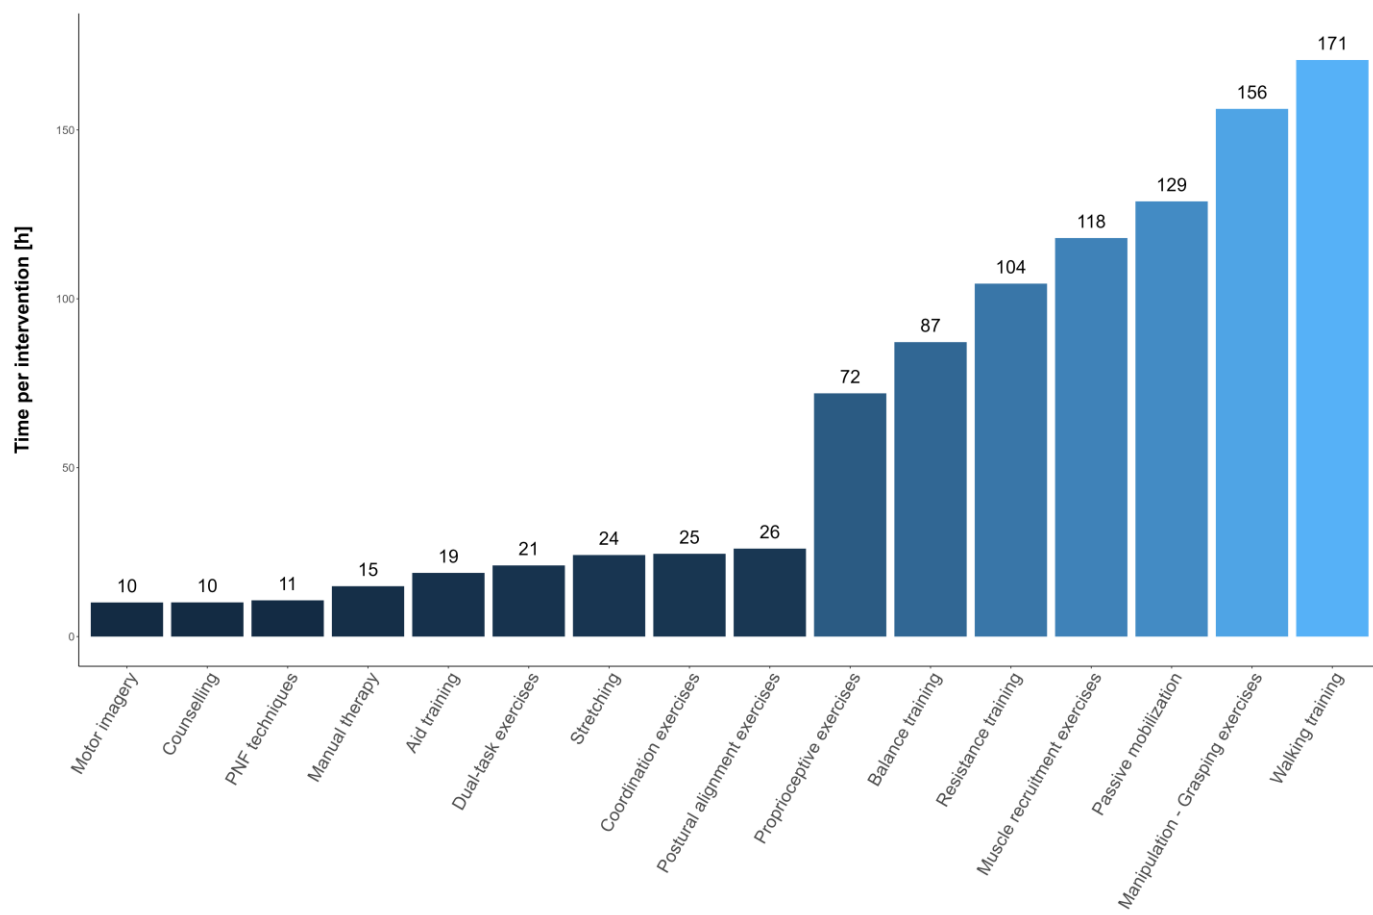

**Figure S6.** PT interventions PwMS.

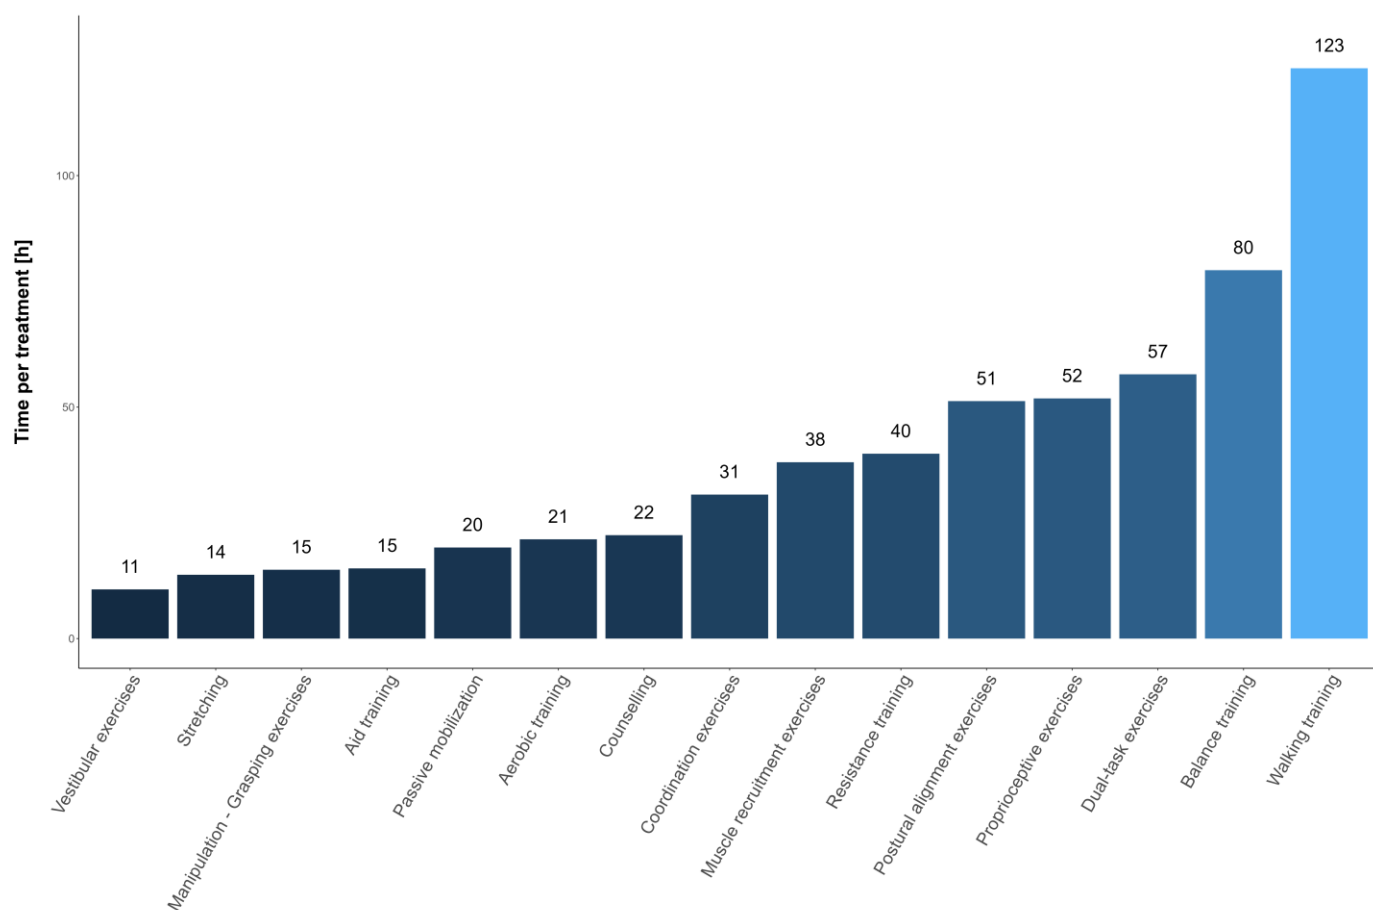

**Figure S7.** PT interventions PwPD.
